# Supplementary material
Source: MDPI journal article supplement (https://www.mdpi.com/2072-4292/11/10/1235)

Supplementary Information.

Title: "Identifying Dry-Season Rice-Planting Patterns in Bangladesh using the Landsat Archive".

**Table S1.** Rice seasons and production, BBS reporting for 2013–2016.

| <b>Season</b>                             | <b>Year</b> | <b>Area<br/>(1000s hectares)</b> | <b>Production<br/>(1000s Mt)</b> | <b>Yield<br/>(Mt/ha)</b> |
|-------------------------------------------|-------------|----------------------------------|----------------------------------|--------------------------|
| Early Summer.<br>Aus.<br>(April–August).  | 2015–2016.  | 1018.623.                        | 2288.                            | 2.246..                  |
|                                           | 2014–2015   | 1045.749                         | 2328                             | 2.226                    |
|                                           | 2013–2014   | 1051.822                         | 2326                             | 2.211                    |
| Monsoon<br>Aman<br>(July–November)        | 2015–2016   | 5592.713                         | 13484                            | 2.411                    |
|                                           | 2014–2015   | 5532.389                         | 13190                            | 2.384                    |
|                                           | 2013–2014   | 5532.794                         | 13023                            | 2.354                    |
| Dry Irrigated<br>Boro<br>(December–April) | 2015–2016   | 4774.899                         | 18938                            | 3.966                    |
|                                           | 2014–2015   | 4842.51                          | 19192                            | 3.963                    |
|                                           | 2013–2014   | 4792.308                         | 19007                            | 3.966                    |

**Figure S1.** Locations of boro and other classes as identified by high-resolution image interpretation.

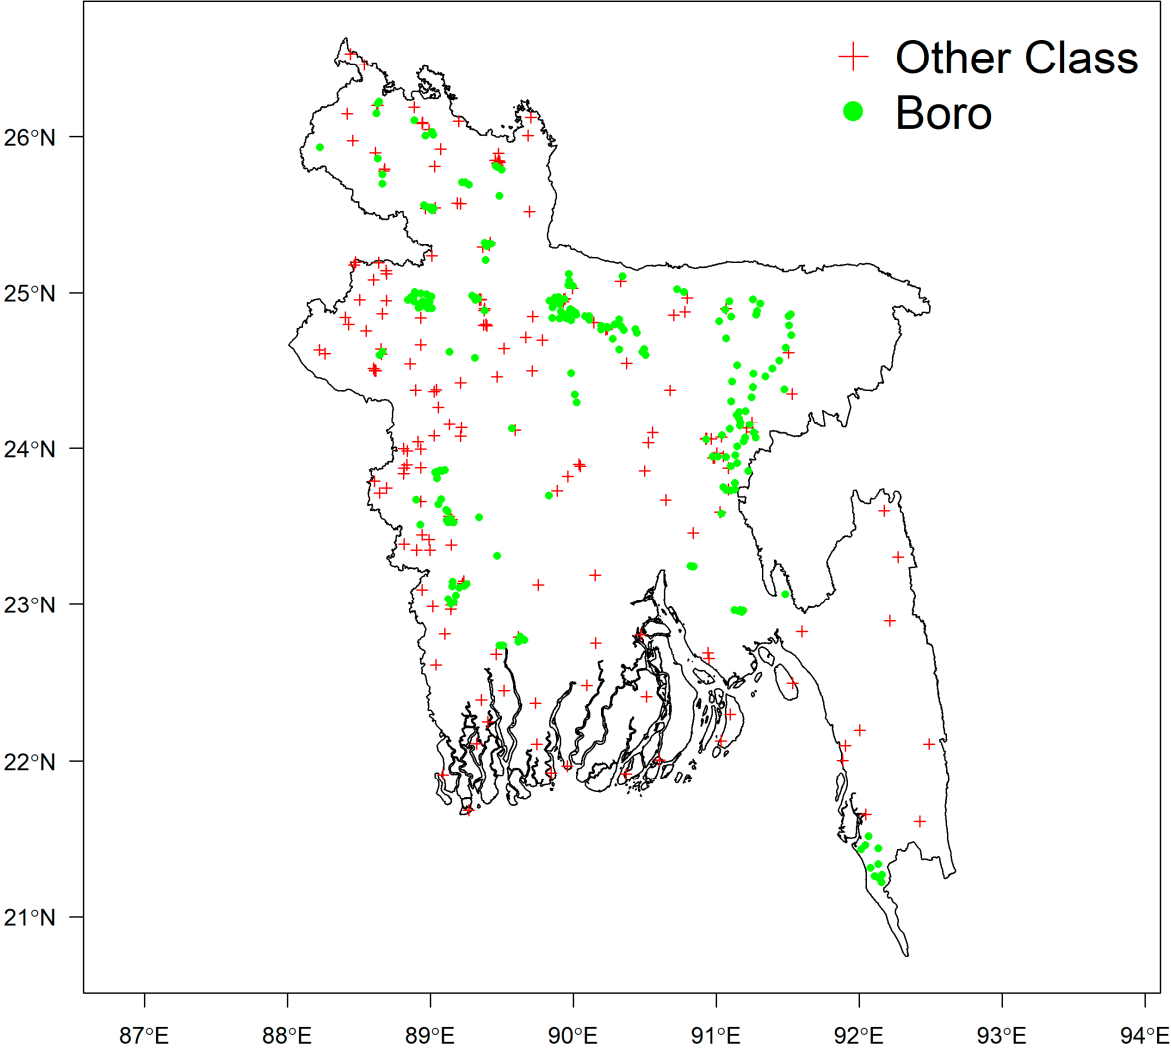

**Figure S2.** District-wise map of the HTS-VIs results for 2014–2018.

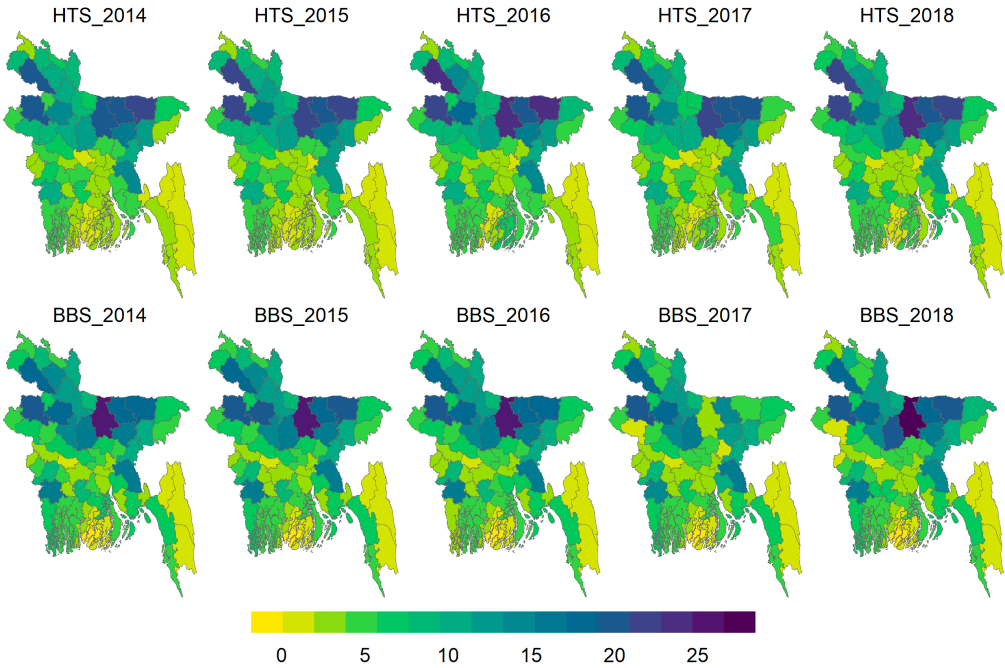

Supplement: s1 [file s1]
